# Supplementary material for: Dithiocarbamate-capped silver nanoparticles as a resonance light scattering probe for simultaneous detection of lead(ii) ions and cysteine
Source: Royal Society of Chemistry journal article supplement (doi:10.1039/c3an36868h), 2013-01-01
Supplement: c3an36868h.pdf [file c3an36868h.pdf]

Electronic Supplementary Information

**Dithiocarbamate-capped silver nanoparticles as a resonance light  
scattering probe for simultaneous detection of lead(II) ions and  
cysteine**

**Haiyan Cao,<sup>a</sup> Minghong Wei,<sup>a</sup> Zhaohui Chen,<sup>\*a,b</sup> Yuming Huang<sup>\*a</sup>**

*<sup>a</sup> State Key Laboratory Breeding Base of Eco-Environments and Bio-Resources of  
the Three Gorges Reservoir Region; College of Chemistry and Chemical  
Engineering, Southwest University, Chongqing 400715, China.*

*E-mail: ymhuang@swu.edu.cn*

*<sup>b</sup> Basic Department of Rongchang Campus, Southwest University, Chongqing  
402460, China. E-mail: zhaohuic@swu.edu.cn*

Supplementary Material (ESI) for Analyst  
This journal is (c) The Royal Society of Chemistry 2013

**Table S1.** The effect of  $\text{Pb}^{2+}$  concentration on the hydrodynamic diameter and surface charges of the DTC-Ag NPs.

| Concentration of $\text{Pb}^{2+}$<br>( $\mu\text{M}$ ) | Average particle size<br>(nm) | Zeta Potential<br>(mV) |
|--------------------------------------------------------|-------------------------------|------------------------|
| 0                                                      | 26.95                         | -46.7                  |
| 1                                                      | 28.88                         | -34.6                  |
| 10                                                     | 246.1                         | -26.7                  |
| 100                                                    | 1024.8                        | 19.1                   |

**Table S2.** The effect of cysteine concentration on the hydrodynamic diameter and surface charges of the DTC-Ag NPs in the presence of  $20 \mu\text{M}$   $\text{Pb}^{2+}$ .

| Concentration of cysteine<br>( $\mu\text{M}$ ) | Average particle size<br>(nm) | Zeta Potential<br>(mV) |
|------------------------------------------------|-------------------------------|------------------------|
| 0                                              | 298.5                         | -18.7                  |
| 0.2                                            | 186.1                         | -21.7                  |
| 2                                              | 168.5                         | -27.2                  |
| 20                                             | 41.4                          | -32.7                  |

Supplementary Material (ESI) for Analyst  
This journal is (c) The Royal Society of Chemistry 2013

**Table S3** LOD comparison of this work with some established methods for Pb<sup>2+</sup>

| System                                             | Detection limit (μM) | Analytical methods | References |
|----------------------------------------------------|----------------------|--------------------|------------|
| Thiol-capped CdTe QDs                              | 0.27                 | Fluorescence       | 1          |
| Glutathione-functionalized Au NPs                  | 0.1                  | Colorimetric       | 2          |
| DNAzyme-functionalized Au NPs                      | 0.1                  | Colorimetric       | 3          |
| Pentapeptide-Au NPs                                | 0.1                  | Colorimetric       | 4          |
| Gallic acid-Au NPs                                 | 0.025                | Colorimetric       | 5          |
| Functionalized fluorescent Au NDs                  | 0.002                | Fluorescence       | 6          |
| Podand triazole-linked Au NPs                      | 7                    | Colorimetric       | 7          |
| Gallic acid-Au NPs or Ag NPs                       | 5                    | Colorimetric       | 8          |
| dsDNA-Cu NPs                                       | 0.005                | Fluorescence       | 9          |
| di-(2-picolyl) amine (DPA) substituted diacetylene | 4                    | Fluorescence       | 10         |
| Ammonium molybdate                                 | 0.009                | Light scattering   | 11         |
| Sodium tetraphenylboron-polyethylene glycol        | 0.013                | Light scattering   | 12         |
| DEA-Ag NPs                                         | 0.004                | Light scattering   | this work  |

**References**

1. H. M. Wu, J. G. Liang and H. Y. Han, *Microchim. Acta*, 2008, **161**, 81-86.
2. F. Chai, C. Wang, T. Wang, L. Li and Z. Su, *ACS Applied Materials & Interfaces*, 2010, **2**, 1466-1470.
3. J. Liu and Y. Lu, *J. Am. Chem. Soc.*, 2003, **125**, 6642-6643.
4. Z. X. Wang and X. K. Li, *Chem Res Chinese U*, 2010, **26**, 194-197.
5. N. Ding, Q. Cao, H. Zhao, Y. Yang, L. Zeng, Y. He, K. Xiang and G. Wang, *Sensors-Basel*, 2010, **10**, 11144-11155.
6. Z. Yuan, M. Peng, Y. He and E. S. Yeung, *Chem. Commun.*, 2011, **47**, 11981-11983.
7. H. Li, Q. Zheng and C. Han, *Analyst*, 2010, **135**, 1360-1364.
8. K. G. Thomas, K. Yoosaf, B. I. Ipe and C. H. Suresh, *J. Phys. Chem. C*, 2007, **111**, 12839-12847.
9. J. Chen, J. Liu, Z. Fang and L. Zeng, *Chem. Commun.*, 2012, **48**, 1057-1059.
10. K. M. Lee, X. Chen, W. Fang, J.-M. Kim and J. Yoon, *Macromol. Rapid Commun.*, 2011, **32**, 497-500.
11. Y. Cui, F. Cui, L. Wang, Q. Zhang, W. Xue, F. Jing and J. Sun, *J. Lumin.*, 2008, **128**, 1719-1724.
12. K. J. Tan, C. Z. Huang and Y. M. Huang, *Talanta*, 2006, **70**, 116-121.

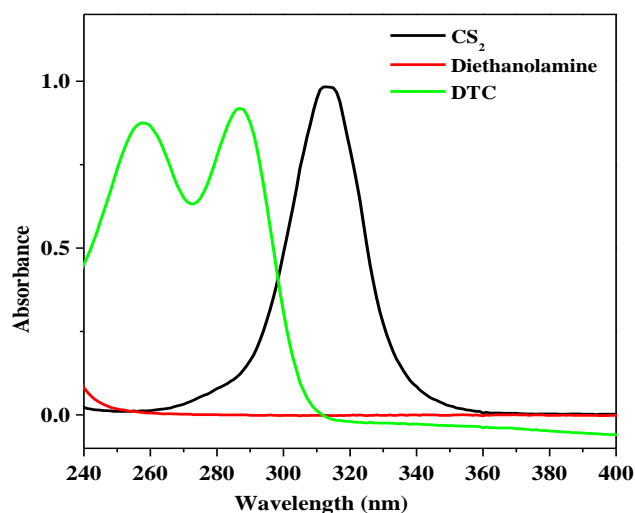

**Figure S1.** UV absorption spectra of CS<sub>2</sub>, diethanolamine, and mixture of CS<sub>2</sub> and diethanolamine (after 1 min mixing under sonication).

Supplementary Material (ESI) for Analyst  
This journal is (c) The Royal Society of Chemistry 2013

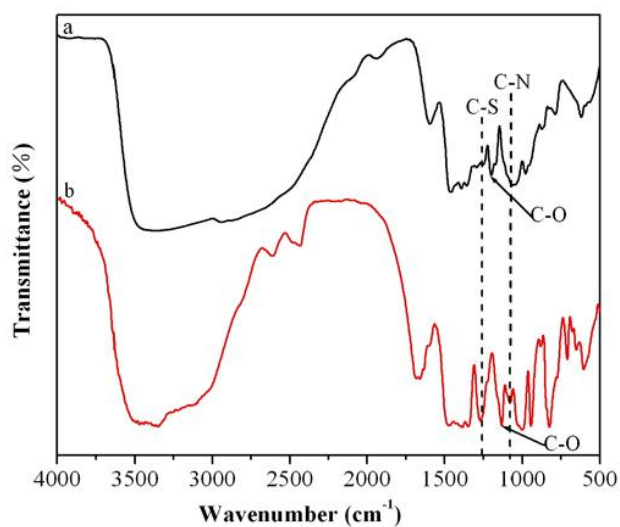

**Figure S2.** FTIR spectra of (a) DTC; (b) DTC-Ag NPs.

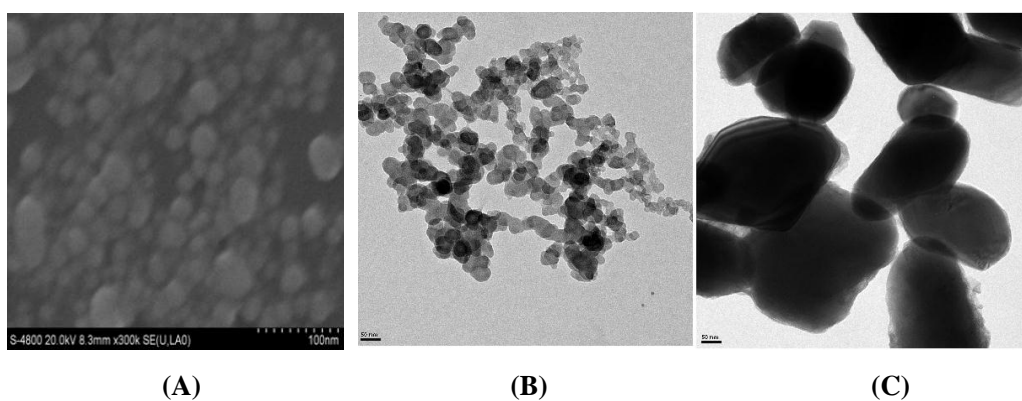

**Figure S3.** (A) SEM image of DTC-Ag NPs (scale bar corresponds to 100 nm). TEM images of DTC-Ag NPs without (B) and with (C) Pb<sup>2+</sup> (scale bar corresponds to 50 nm).

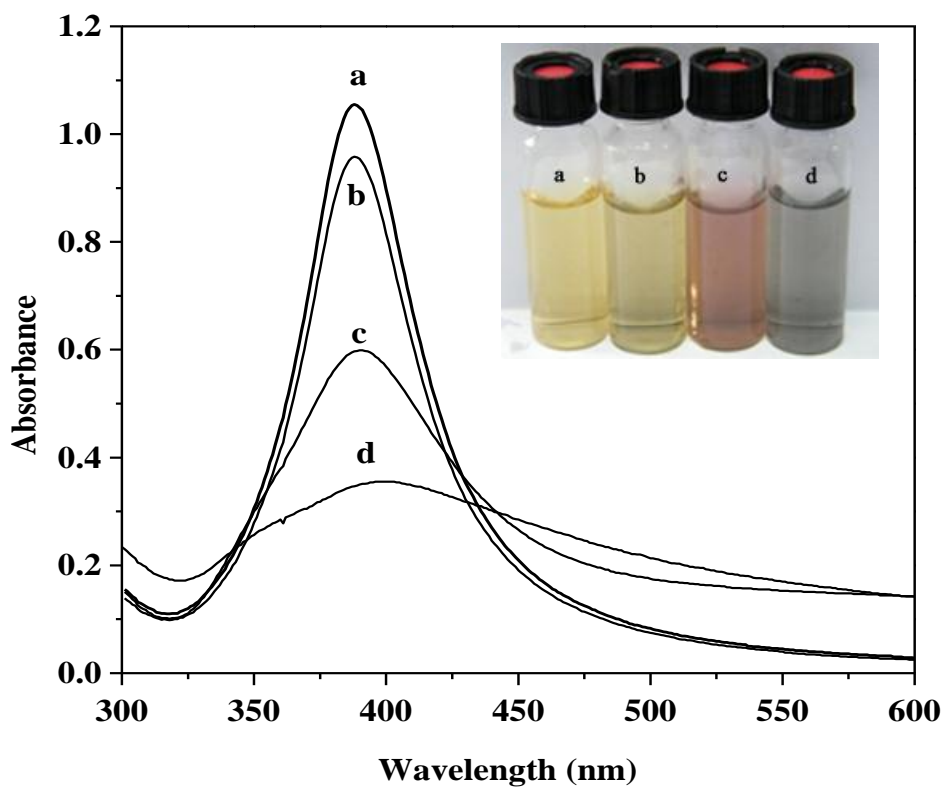

**Figure S4.** UV-Vis absorption spectra of the DEA-Ag NPs ( $8.64 \text{ mg L}^{-1}$  as Ag) solution at different concentration of  $\text{Pb}^{2+}$ : (a)  $0 \text{ } \mu\text{M}$ ; (b)  $1 \text{ } \mu\text{M}$ ; (c)  $5 \text{ } \mu\text{M}$ ; (d)  $20 \text{ } \mu\text{M}$ .

Inset: The color change with different concentration of  $\text{Pb}^{2+}$ .

Supplementary Material (ESI) for Analyst  
This journal is (c) The Royal Society of Chemistry 2013

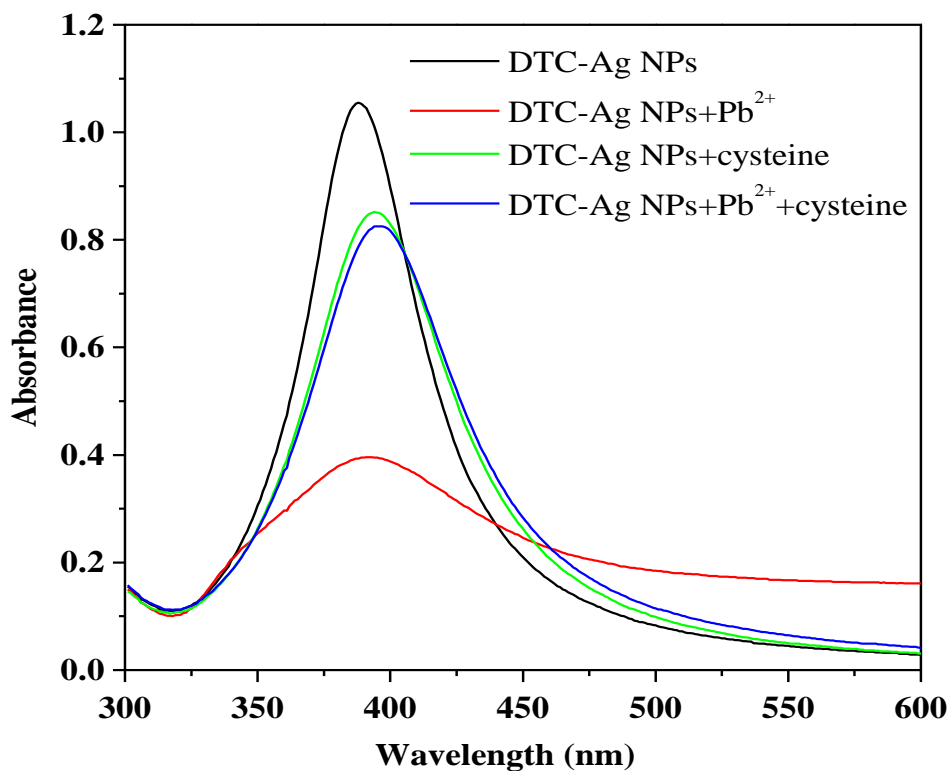

**Figure S5.** UV-Vis absorption spectra of the DEA-Ag NPs- Pb<sup>2+</sup> system at different concentration of cysteine. Reaction conditions: 8.64 mg L<sup>-1</sup> DEA-Ag NPs (as Ag), 10 μM Pb<sup>2+</sup>, and 10 μM cysteine.

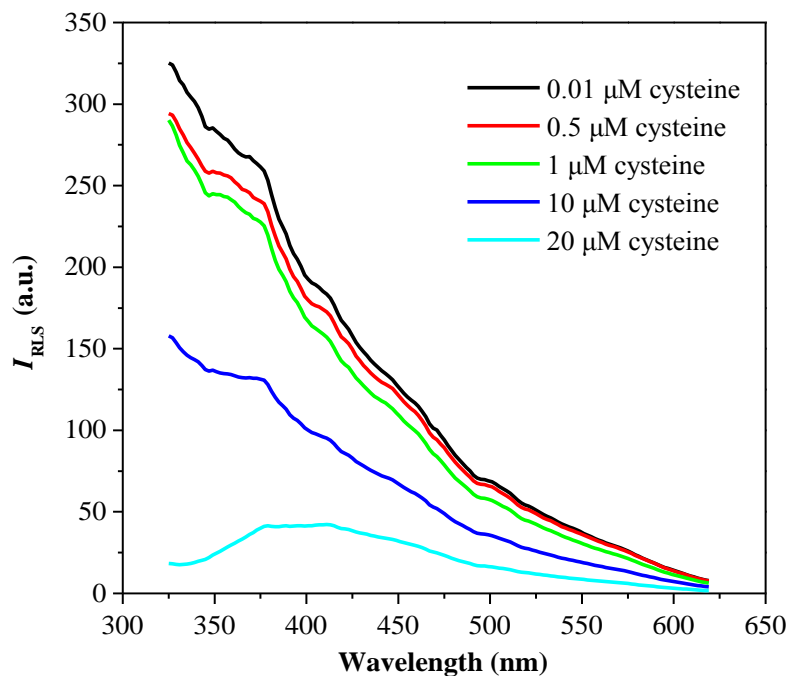

**Figure S6.** The RLS spectra of DTC-Ag NPs (648 μg L<sup>-1</sup> as Ag)-Pb<sup>2+</sup> system with various concentrations of cysteine (0.01, 0.5, 1, 10, and 20 μM, respectively).

Supplementary Material (ESI) for Analyst  
This journal is (c) The Royal Society of Chemistry 2013

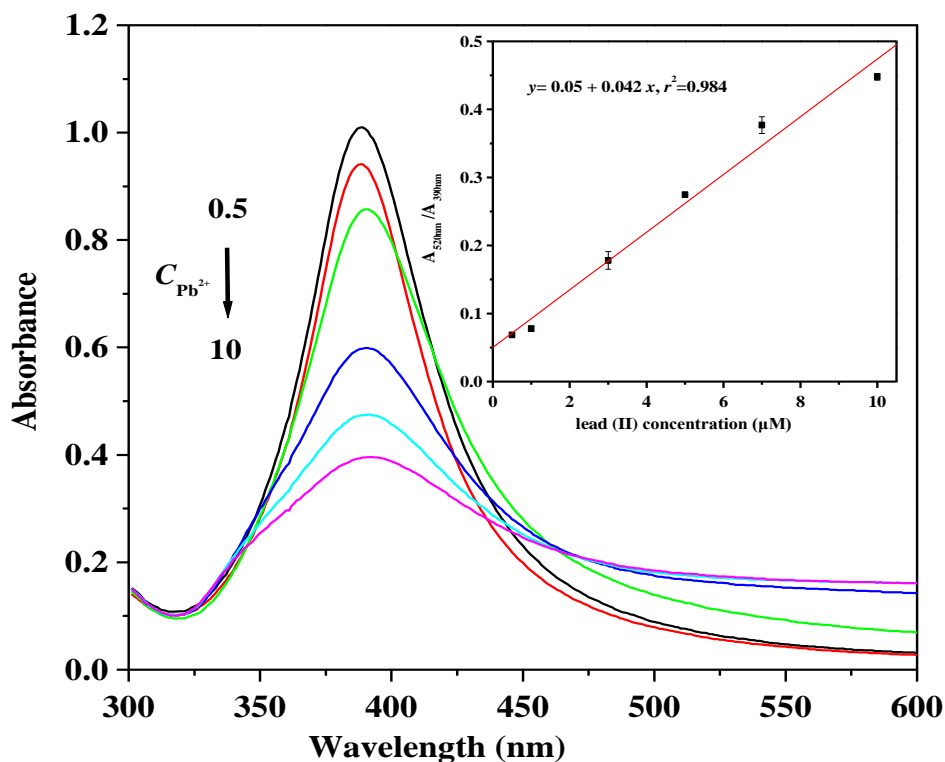

**Figure S7.** The absorbance spectra of DTC-Ag NPs (8.64 mg L<sup>-1</sup> as Ag) with addition of various concentrations of Pb<sup>2+</sup> (0.5, 1, 3, 5, 7, 10 μM, respectively). The inset is linear calibrated curve for Pb<sup>2+</sup>.

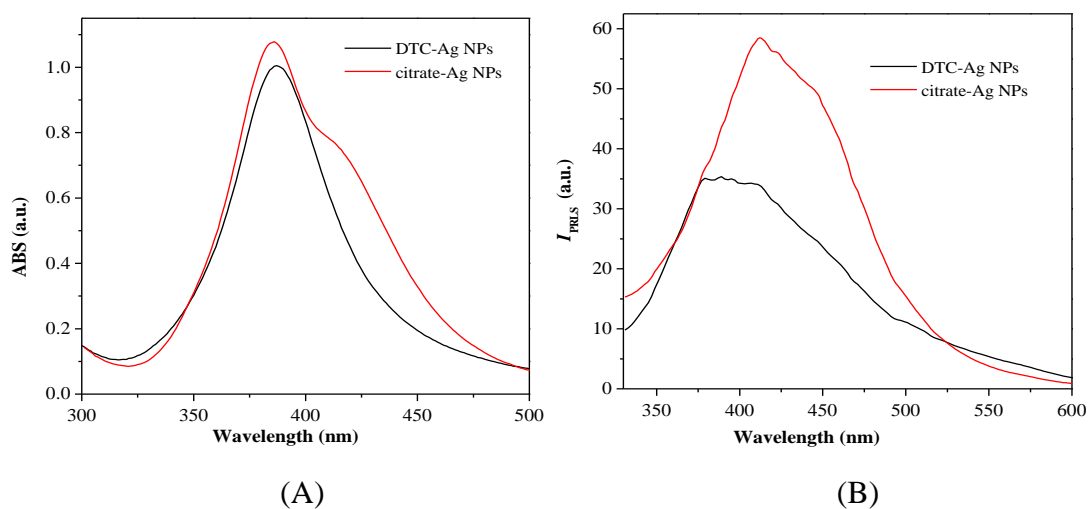

**Figure S8.** (A) UV-Vis absorption spectra of the DTC-Ag NPs (8.64 mg L<sup>-1</sup> as Ag) solution and the citrate-AgNPs (8.64 mg L<sup>-1</sup> as Ag). (B) The RLS spectra of DTC-Ag NPs (648 μg L<sup>-1</sup> as Ag) solution and the citrate-AgNPs (648 μg L<sup>-1</sup> as Ag).

Supplementary Material (ESI) for Analyst  
This journal is (c) The Royal Society of Chemistry 2013

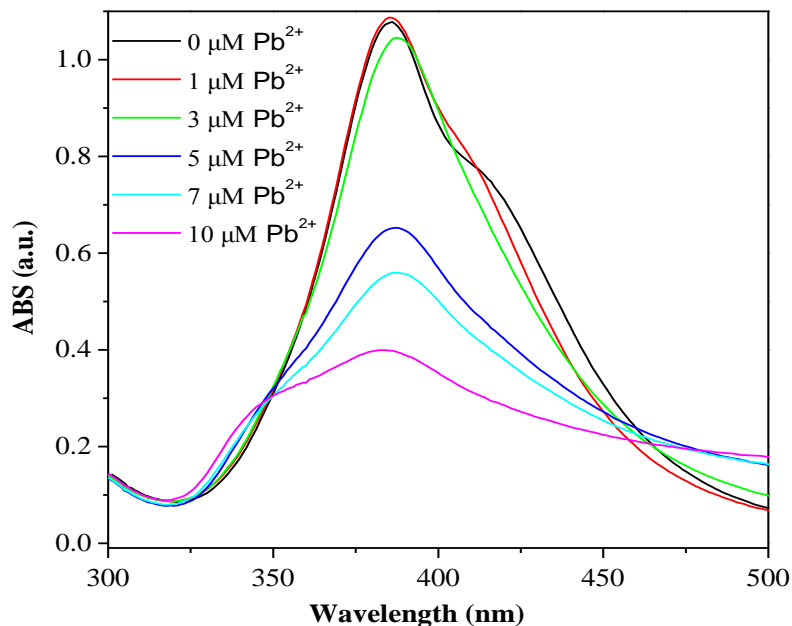

**Figure S9.** The absorbance spectra of citrate-Ag NPs (8.64 mg L<sup>-1</sup> as Ag) with addition of various concentrations of Pb<sup>2+</sup> (0, 1, 3, 5, 7, 10 μM, respectively).

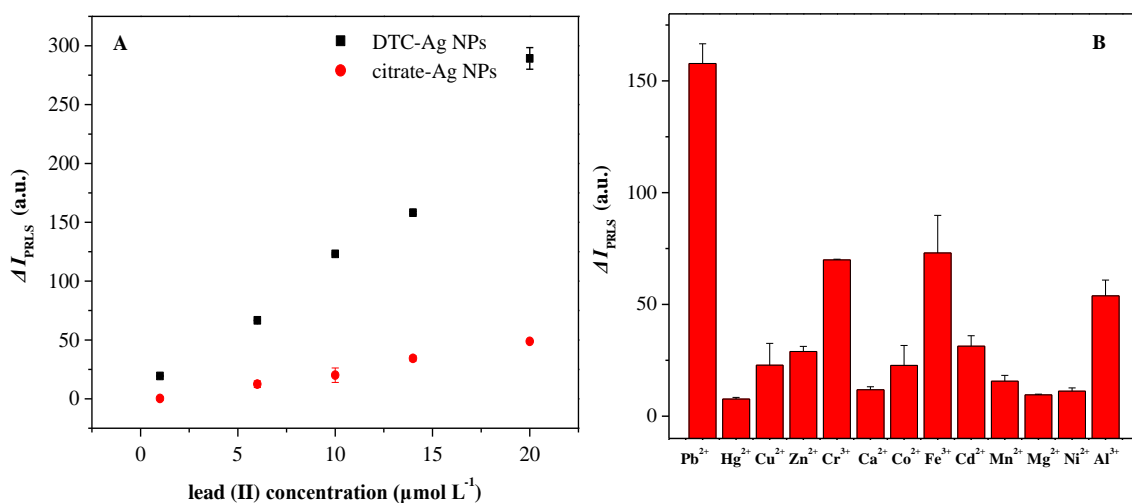

**Figure S10.** (A) The net RLS intensity of DTC-Ag NPs (black square) with addition of various concentrations of Pb<sup>2+</sup> (1, 6, 10, 14, and 20 μM) and citrate-Ag NPs (red dot) with addition of various concentrations of Pb<sup>2+</sup> (1, 6, 10, 14, and 20 μM). (B) Selectivity of the citrate-Ag NPs-based RLS probe for Pb<sup>2+</sup> over other ions. Concentrations of citrate-Ag NPs and Pb<sup>2+</sup> were 0.65 mg L<sup>-1</sup> and 60 μM respectively; concentrations of all other metal ions were 60 μM. Error bars represent one standard deviation for three measurements.



Supplementary Material (ESI) for Analyst  
This journal is (c) The Royal Society of Chemistry 2013

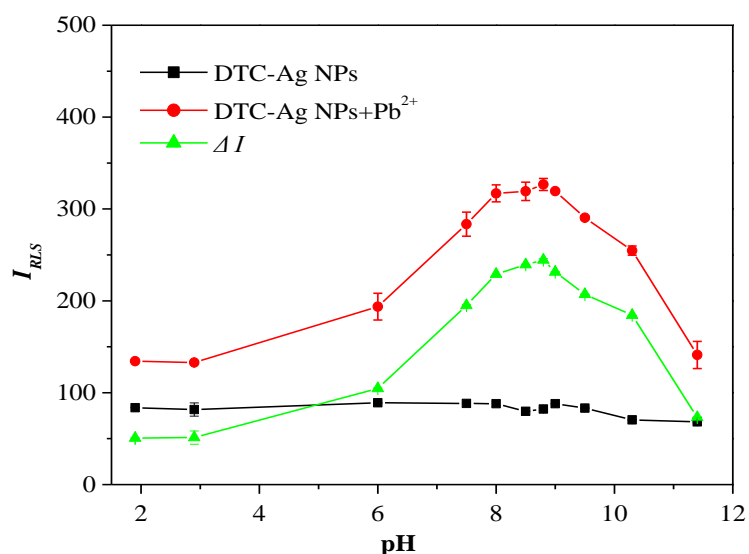

**Figure S11.** Effect of pH on RLS intensity of DTC-Ag NPs with and without  $Pb^{2+}$ . Reaction conditions: DTC-Ag NPs concentration:  $1.73 \text{ mg L}^{-1}$  (as Ag);  $Pb^{2+}$  concentration:  $20 \text{ }\mu\text{M}$ . Error bars represent one standard deviation for three measurements.

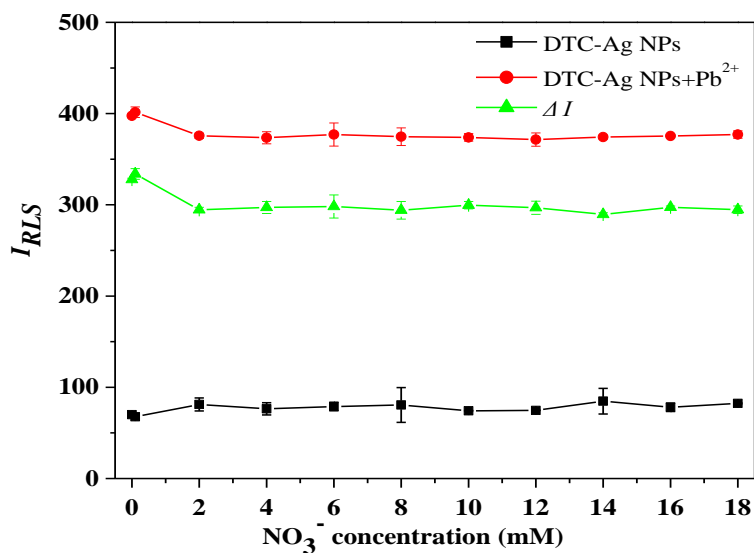

**Figure S12.** Effect of salinity on RLS intensity of DTC-Ag NPs with and without  $Pb^{2+}$ . Reaction conditions: DTC-Ag NPs concentration:  $1.73 \text{ mg L}^{-1}$  (as Ag);  $Pb^{2+}$  concentration:  $20 \text{ }\mu\text{M}$ . Error bars represent one standard deviation for three measurements.

Supplementary Material (ESI) for Analyst  
This journal is (c) The Royal Society of Chemistry 2013

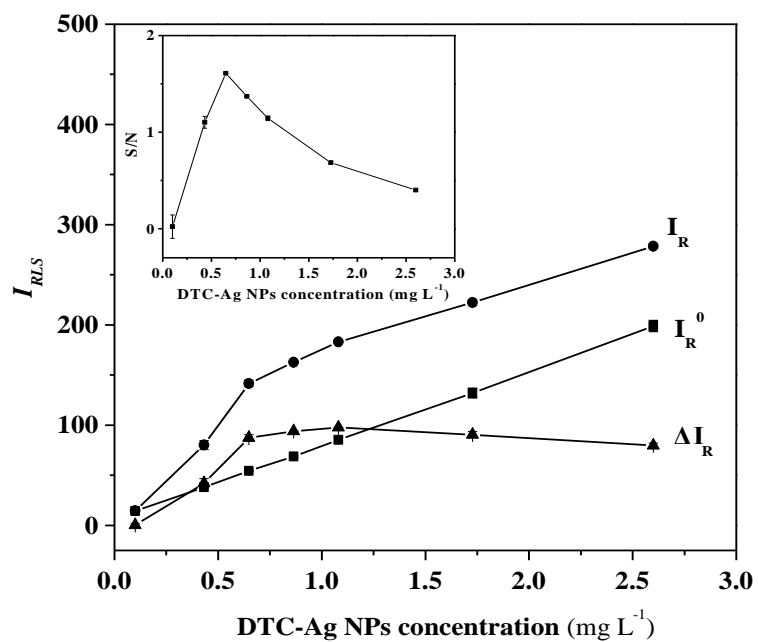

**Figure S13.** Effect of DTC-Ag NPs concentration. Pb<sup>2+</sup> concentration: 6 μM. Error bars represent one standard deviation for three measurements.

Supplementary Material (ESI) for Analyst  
This journal is (c) The Royal Society of Chemistry 2013

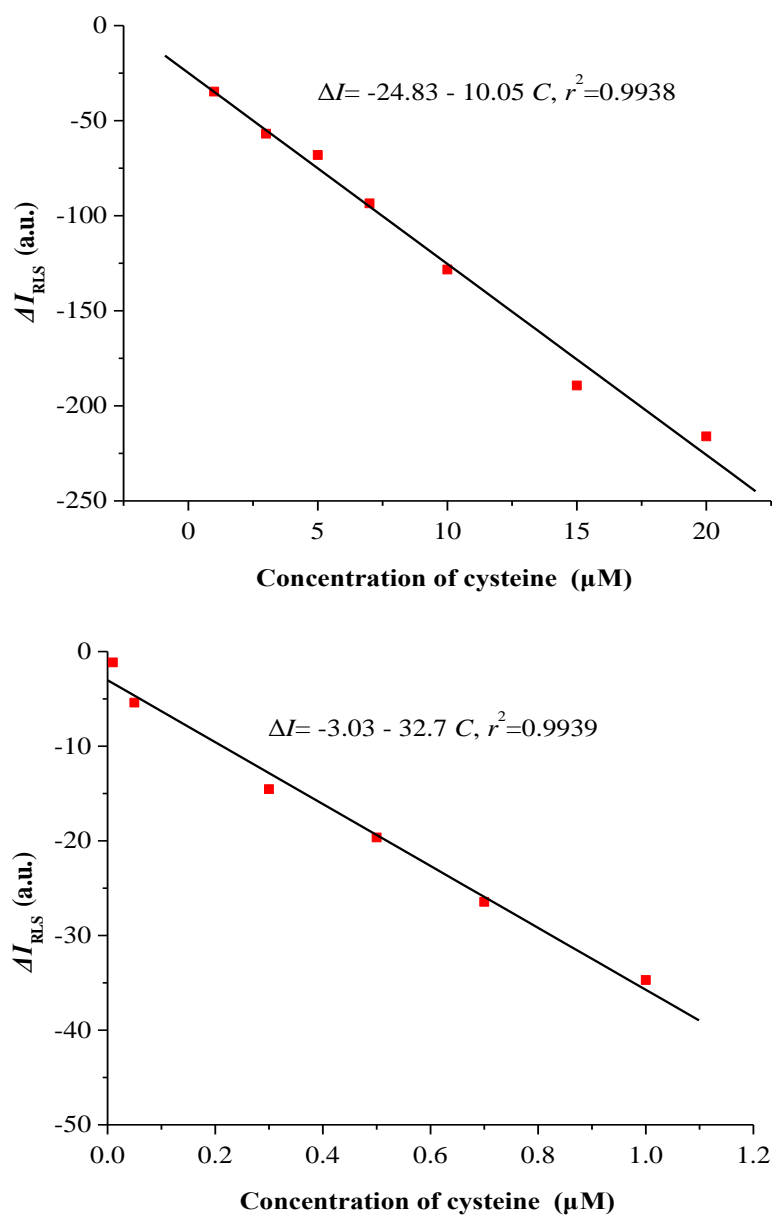

**Figure S14.** The response curves of cysteine.
